# Supplementary material for: Indocyanine green fluorescence-guided surgery in the emergency setting: the WSES international consensus position paper
Source: Springer Nature journal article supplement (doi:10.1186/s13017-025-00575-w), 2025-02-13
Supplement: MOESM1 [file 13017_2025_575_MOESM1_ESM.docx]

**Question n.1:**

**Which clinical scenarios and indications for the use of ICG fluorescence guided surgery in the emergency setting to improve outcomes in urgent surgical patients?**

**Surgical urgent scenarios:**

- **Acute cholecystitis;**
- **Intestinal ischemia and strangulated bowel;**
- **Abdominal Trauma;**
- **Prevention of anastomotic leakage after intestinal/colon resection in the emergency setting.**

**The use of ICG cholangiography in performing cholecystectomy for acute cholecystitis.**

**Statement 1:**

ICG cholangiography is useful to have a good visualization of the biliary structures during cholecystectomy for acute cholecystitis, decreasing the operative time, conversion rate to open technique and negative outcomes. [QoE C] *(totally disagree 0%; neutral 22.6%-7/31 participants;* ***agree 29%-9/31participants;******totally agree 38.7%-12/31 participants****)*

**Recommendation 1**

The WSES Panel of Experts suggests that the use of ICG cholangiography allows the correct and real-time visualisation of the extra-hepatic biliary tree anatomy during laparoscopic cholecystectomies for severe cholecystitis and it can reduce the rate of bile ducts injury and conversion in laparotomy in the emergency setting (Moderate recommendation based on a low level evidence 2C). *(Totally disagree 3.2%-1/31particpants; neutral 22.6%-7/31participants;* ***agree 12.9%-4/31participants; totally agree 54.8%-17/31participants)***

**The use of ICG angiography in managing intestinal ischemia and strangulated bowel.**

**Statement 1.1**

ICG angiography can be performed safely in the emergency setting and it is a useful tool to evaluate the intestinal vascularization patterns in the setting of acute intestinal ischemia and strangulated bowel. Case series and retrospective studies reported that intestinal perfusion is visualized adequately in the most of cases (QoE C) *(totally disagree 0%; neutral 12.9%-4/31participants;* ***agree 35.5% 11/31participants;*** *t****otally agree 48.4%-15/31participants****)*

**Recommandation 1.1**

The WSES Panel of Experts suggests to consider the use of ICG angiography to guide intra-operative decision-making in patients presenting with non-occlusive mesenteric ischemia, occlusive mesenteric ischemia and strangulated bowel in order to evaluate the intestinal blood flow and viability and accurately define resection margins and anastomosis, when it is available (Moderate recommendation based on a low level evidence 2C) *(totally disagree 0%; neutral 6.5%-2/31participants;* ***agree 45.2%-14/31participants; totally agree 48.4%-15/31participants****)*

**The use of ICG angiography in managing abdominal blunt and penetrating trauma.**

**Statement 1.2**

In the trauma setting, the use of ICG in abdominal trauma patients undergoing surgical exploration can assist surgeons in assessing the bowel viability in case of mesenteric lacerations and hematomas, and deciding to resect, how much extent the resection or preserve the involved bowel. [QeE C] *(totally disagree 0%; neutral 32.3%-10/31participants;* ***agree 32.3%-10/31participants; totally agree 29%-9/31participants)****.*

**Recommendation 1.2**

The WSES Panel of Experts suggests to consider the use of ICG angiography to assess the blood perfusion in a high-risk intestinal/bowel segment in the presence of mesenteric lacerations and hematomas in order to guide surgeons in the decision making for the appropriate repair. Moreover, it is useful in properly assessing the viability of the anastomotic edges and in visualising ischemic intestinal segment apparently presenting blood supply, preventing postoperative complications and planned surgical second look (Moderate recommendation based on low level evidence) *(totally disagree 0%; neutral 9.7%-9/31participants;* ***agree 35.5%-11/31participants; totally agree 32.3%-10/31participants****).*

**ICG angiography and the prevention of anastomotic leakage in the emergency setting.**

**Statement 1.3**

The use of ICG fluorescence angiography can help surgeons in preventing anastomotic leakage, assessing vascular perfusion of the intestinal anastomosis [QoE C] *(totally disagree 0%; neutral 9.7%-3/31participants;* ***agree 48.4%-15/31participants; totally agree 41.9%-13/31participants)***

**Recommendation 1.3**

TheWSES panel of Experts suggests to consider the use of ICG fluorescence angiography to assess the perfusion quality of intestinal anastomosis in preventing anastomotic leakage after emergency intestinal/bowel resection, when it is available (Moderate recommendation based on low level evidence) *(totally disagree 0%; neutral 9.7%-3/31participants;* ***agree 41.9%-13/31participants; totally agree 48.4%-15/31participants****).*

**Question 2:**

**Which patients’ factors and clinical features do influence ICG fluorescence images quality in the emergency setting?**

**In which patients and setting, the ICG-guided emergency surgery is contraindicated?**

**Statement 2.1**

The Indocyanine green (ICG) contrast is safe and no major adverse events from its use were reported in the literature for abdominal surgery [QoE C] *(totally disagree 0%; neutral 9.7%-3/31participants;* ***agree 19.4%-6/31participants; totally agree 67.7%-21/31participants****).*

**Statement 2.2**

The administration of ICG fluorophore is contraindicated in patients with previous adverse events or allergy proven to iodine contrasts [QoE C] *(totally disagree 6.5%-2/31participants; neutral 19.4%-6/31participants;* ***agree 25.8%-8/31participants; totally agree 48.4%-15/31participants)****.*

**Statement 2.3**

The administration of ICG solution in pregnant patients should be avoided in absence of clear evidence of non teratogenic effect. [QoE C] *(totally disagree 0%; neutral 16.1%-5/31participants;* ***agree 22.6%-10/31participants; totally agree 48.4%-15/31participants****).*

**Statement 2.4**

The administration of inotropes in managing patient’s hemodynamic seems not to contraindicate the use of ICG fluorescence imaging [QoE D] *(totally disagree 0%; neutral 12.9%-4/31participants;* ***agree 32.3%-10/31participants; totally agree 51.6%-16/31participants****).*

**Statement 2.5**

ICG fluorophore has an hepatic clearance, therefore images quality can be affected by the patient’s hepatic flow and function. No relevant studies have assessed this phenomenon specifically [QoE D]. *(totally disagree 0%; neutral 22.6%-7/31participants;* ***agree 25.8%-8/31participants; totally agree 45.2%-14/31participants****).*

**Statement 2.6**

Studies indicate that BMI >25 kg/m² and cholecystitis can reduce biliary structure visibility in ICG-NIR cholangiography, especially for deeper structures like the common hepatic duct because of tissues thickness (>=3mm) [QoE C]. *(totally disagree 0%; neutral 22.6%-7/31participants;* ***agree 41.9%-13/31participants; totally agree 29%-9/31participants****).*

**Recommendations 2**

The WSES Panel of Experts suggests to evaluate case by case, the benefits from the use of ICG fluorescence angiography and cholangiography, in performing an emergency high-risk surgical procedure according to the extremely low risk of an adverse reaction and the risk of negative outcomes and postoperative complications (Moderate recommendation based on low level evidence 2C). *(totally disagree 3.2%-1/31; neutral 9.7%-3/31participants;* ***agree 25.8%-7/31participants; totally agree 58.1%-18/31participants****).*

The hepatic ICG metabolism, cardiac output, microangiopathy, BMI, and edema-thick and deep tissues, such as in severe inflamed acute cholecystitis, were reported as risk factors for variations in fluorescence intensity and images quality, according to the quantitative method of assessment. Moreover, microvascular blood flow is influenced by the patient’s general condition during the perioperative period. Low blood pressure, poor respiratory condition, or the use of vasopressor drugs may have a deleterious influence on the tissues perfusion.

In clinical practice, ICG fluorescence images are currently assessed by qualitative methods based on surgeon’s eye experience. The WSES Panel of Experts suggests that the hemodynamic status should be the main clinical factor to consider in decision making of performing an intestinal resection and anastomosis in acute intestinal ischemia and strangulated hernia cases. In any condition in which the tissues are very thick due to edema and obesity, the fluorescence intensity can be reduced. However, the ICG angiography and cholangiography are valid tools to support surgeon’s decision in the emergency setting and should be implemented when they are available (Moderate recommendation based on a low and very low level evidence). *(totally disagree 0%; neutral 16.1%-5/31participants;* ***agree 22.6%-7/31participants; totally agree 58.1%-18/31participants****).*

**Question n.3:**

**Which protocol of administration, acquisition and interpretation of images in the different urgent clinical scenarios including cholecystitis, incarcerated/stragulated hernia, intestinal ischemia, intestinal and bowel anastomosis evaluation?**

**ICG fluorescence cholangiography**

**Recommendations 3.1**

**Timing of administration.**

WSES panel of Experts suggests to consider the intravenous administration of ICG at the induction of general anesthesia before surgery. The ICG local gallbladder administration is an intraoperative option and it requires that the ICG is administrated during the procedure before the dissection of the gallbladder. [Moderate recommendation based on low quality evidence. 2C] *(totally disagree 0%; neutral 12.9%-4/31participants;* ***agree 29%-9/31participants; totally agree 48.4%-15/31participants****).*

**Dose of administration.**

The WSES panel of Experts recommends to consider the administration of a 5mg of ICG in a single IV dose in performing a fluorescent cholangiography. Additional doses have not to overpass the maximum dose (2mg/kg) described and they can improve visibility in obese patients presenting an inflamed cholecystitis. In case of local administration of ICG, it is reported to administrate 2.5mg/ml with a dilution of 9 mL of bile mixed with 1 mL of a preparation of ICG and sterile water at a concentration of 0.25 mg/mL, directly in the gallbladder, before dissection (ICG concentration = 0.025 mg/mL) [Moderate recommendation based on low quality evidence. 2C]. *(totally disagree 0%; neutral 12.9%-4/31participants;* ***agree 41.9%-13/31participants; totally agree 32.3%-10/31participants****).*

**Dilution of ICG.**

The WSES panel of experts suggests to dilute ICG in performing fluorescent cholangiography with Sterile Water, even if few authors use albumin or saline solution. [Moderate recommendation based on low quality evidence. 2C] *(totally disagree 0%; neutral 12.9%-4/31participants;* ***agree 22.6%-7/31participants; totally agree 58.1%-18/31participants****).*

**Administration route.**

The WSES panel of Experts suggests to consider either the intravenous or intra-gallbladder administration of IGC in performing fluorescent cholangiography, always taking into account the limitations of the chosen injection point in each scenario [Moderate recommendation based on low quality evidence. 2C] *(totally disagree 0%; neutral 19.4%-6/31participants;* ***agree 29%-9/31participants; totally agree 51.6%-16/31participants****).*

**Time acquisition images.**

The WSES panel of Expertssuggest to consider the acquisition time of ICG fluorescence images before starting gallbladder’s dissection, during Calot’s dissection and before clipping any structure, although, anytime that the surgeons need it. [Moderate recommendation based on low quality evidence. 2C] *(totally disagree 0%; neutral 12.9%-4/31participants;* ***agree 22.6%-7/31participants; totally agree 58.1%-18/31participants****).*

**Quantitative and qualitative interpretation of ICG fluorescence cholangiography**

The WSES Panel of Experts acknowledges the potential benefits of developing quantitative and qualitative methods for assessing ICG fluorescence cholangiography. However, given the current lack of robust data, no formal recommendation can be made. Future research should focus on establishing standardized protocols for the objective interpretation of ICG fluorescence images, which could improve the accuracy and utility of this technique in surgical settings. *(totally disagree 0%; neutral 16.1%-5/31participants;* ***agree 16.1%-5/31participants; totally agree 67.7%-21/31participants)****.*

**IGC fluorescence angiography in bowel viability evaluation**

**Recommendations 3.2**

**Timing of administration.**

The WSES panel of Experts suggests to consider to administrate ICG in performing fluorescent angiography few minutes (1-2 minutes) before imaging acquisition, during the surgical procedure, preferably before surgical resection. The exact timing depends on several factors, including the patient’s hemodynamic status, the type of tissue being evaluated, and the specific clinical scenario.

[Moderate recommendation based on low quality evidence. 2C] *(totally disagree 0%; neutral 19.4%-6/31participants;* ***agree 22.6%-7/31participants; totally agree 58.1%-18/31participants****).*

**Dose of administration.**

The WSES panel of Experts suggests to consider the administration of ICG in performing fluorescence angiography as as bolus of 5mg in a single intravenous dose and do not overpass the maximum dose recommended of 2mg/kg or as a weight-adjusted dose ranging from 0.1 mg/kg to 0.5 mg/kg. Dosing adjustments may be necessary depending on the patient's weight, clinical condition, and specific imaging objectives.[Moderate recommendation based on low quality evidence. 2C] *(totally disagree 0%; neutral 9.7%-3/31participants;* ***agree 38.7%-12/31participants; totally agree 51.6%-16/31participants****).*

**Dilution of ICG.**

The WSES panel of Experts suggests to dilute ICG dose in Sterile Water as it is described, even if few authors reported to use albumin or saline solution. [Moderate recommendation based on low quality evidence. 2C] *(totally disagree 0%; neutral 6.5%-2/31participants;* ***agree 25.8%-8/31participants; totally agree 61.3%-19/31participants****).*

**Route of administration.**

The WSES panel of Experts recommends to consider the intravenous administration in performing an ICG angiography, either through peripheral or central catheter infusion. [Moderate recommendation based on low quality evidence. 2C] *(totally disagree 0%; neutral 9.7%-3/31participants;* ***agree 22.6%-7/31participants; totally agree 67.7%-21/31participants****).*

**Time acquisition images.**

The WSES panel of Experts suggests to consider the ICG fluorescence images acquisition in performing fluorescent angiography in the time frame ranging from 30 seconds (±19 seconds) to 3 minutes as fluorescence typically appears within seconds and peaks within 1 to 2 minutes after IV administration, providing an optimal window for assessing tissue perfusion, before deciding to resect [Moderate recommendation based on low quality evidence. 2C] *(totally disagree 3.2%-1/31participants; neutral 9.7%-3/31participants;* ***agree 29%-9/31participants; totally agree 58.1%-18/31participants****).*

**Quantitative and qualitative interpretation in the different clinical scenarios (acute mesenteric ischemia, bowel obstruction, incarcerated hernia and bowel anastomosis)**

The WSES Panel of Experts acknowledges that the current interpretation of ICG fluorescence in clinical scenarios such as acute mesenteric ischemia, bowel obstruction, incarcerated hernia, and bowel anastomosis is predominantly qualitative, relying heavily on the surgeon's visual assessment and experience. While this qualitative approach has been valuable in guiding intraoperative decisions, it is inherently subjective and may vary between practitioners.

Given the emerging potential of quantitative methods, the Panel recommends further research and development in this area to establish standardized protocols for the quantitative interpretation of ICG fluorescence. *(totally disagree 0%; neutral 6.5%-2/31participants;* ***agree 38.7%-12/31participants; totally agree 54.8%-17/31participants****).*

**Question 4:**

**Which are the advantages and disadvantages, including absolute/relative contraindications, limitations and cost/effectiveness of ICG implementation in emergency and trauma surgery?**

**Clinical advantages/disadvantages and absolute/relative contraindications to ICG fluorescence imaging implementation in abdominal trauma surgery**

**Statement 4.1**

Based on reported case-series, there are minimal disadvantages and contraindications toICG-fluorescence use in abdominal trauma surgery for the assessment of bowel viability and bowel anastomosis integrity in relation to bowel perfusion (QoE C). *(totally disagree 0%; neutral 9.7%-3/31participants;* ***agree 29%-9/31participants; totally agree 58.1%-18/31participants****).*

**Recommendation 4a**

The WSES panel of Experts suggests to consider ICG angiography as a valid tool in guiding surgery in the trauma setting, when it is available [Moderate recommendations, low level of evidence 2B]. *(totally disagree 0%; neutral 25.8%-8/31participants;* ***agree 22.6%-7/31participants; totally agree 51.6%-16/31participants****).*

**Limits and cost-effectiveness of ICG fluorescence imaging implementation in abdominal trauma surgery**

**Statement 4.3**

To the best of our knowledge, studies focusing oncost-effectiveness of ICG implementation in abdominal trauma surgery are lacking. (QoE D) *(totally disagree 0%; neutral 16.1%-5/31participants;* ***agree 22.6%-7/31participants; totally agree 61.3%-19/31participants****).*

**Recommendation 4b**

The WSES panel of Experts suggests to consider the use of ICG angiography in abdominal trauma surgery to support the subjective evaluation of the bowel viability in situations such as mesenteric injury and hematoma and to guide the intraoperative decision-making regarding the extent of a bowel resection and the assessment of anastomotic integrity after intestinal/bowel resection [Moderate recommendations, low level of evidence 2C]. *(totally disagree 0%; neutral 16.1%-5/31participants;* ***agree 29%-9/31participants; totally agree 51.6%-16/31participants****).*

**Clinical advantages and disadvantages of ICG implementation imaging in emergency general surgery.**

**Statement 4.4**

ICG fluorescence angiography can provide information about bowel perfusion and assist in defining bowel resection margins, perfusion to bowel anastomosis, and bowel viability with little disadvantages in urgent surgical procedures (QoE C). *(totally disagree 0%; neutral 16.1%-5/31participants;* ***agree 32.3%-10/31participants; totally agree 51.6%-16/31participants****).*

**Statement 4.5**

ICG fluorescence angiography in mesenteric ischemia provides additional macroscopic evaluation of bowel viability that could potentially avoid extensive and inadequate bowel resection in the setting of edematous bowel with ecchymosis or situations where peristalsis cannot be assessed. (QoE C-D) *(totally disagree 0%; neutral 22.6%-7/31participants;* ***agree 12.9%-4/31participants; totally agree 58.1%-18/31participants)****.*

**Statement 4.6**

The use of ICG cholangiography during laparoscopic cholecystectomy provides enhanced visualization of the biliary tree and it guides dissection with a critical view of safety and identification of biliary anatomy. It is effective in preventing bile duct injuries and can likely improve surgical confidence, thereby reducing operating times and lowering the threshold to proceed with emergency laparoscopic cholecystectomies in patient with severe acute cholecystitis. (QoE B) *(totally disagree 0%; neutral 22.6%-7/31participants;* ***agree 12.9%-4/31participants; totally agree 58.1%-18/31participants****).*

**Recommendation 4c**

The WSES panel of Experts recommends to perform an ICG cholangiography in supporting laparoscopic cholecystectomy for acute cholecystitis, as it has minimal disadvantages and contraindications and it has reasonable cost-effectiveness, when equipment and skills are available (Strong recommendations based on moderate and low level of evidence 1B-C) *(totally disagree 0%; neutral 12.9%-4/31participants;* ***agree 12.9%-4/31participants; totally agree 67.7%-21/31participants****).*

**Recommendation 4d**

The WSES panel of Experts recommends the use of ICG fluorescence angiography to assist surgeons in the assessment of bowel perfusion in emergency surgery situations such as in mesenteric ischemia, incarcerated and strangulated hernias, and after bowel resection, when this tool and skills are available [Strong recommendations based on moderate and low level of evidence 1C] *(totally disagree 0%; neutral 6.5%-2/31participants;* ***agree 38.7%-12/31participants; totally agree 54.8%-17/31participant****s).*

**Limits and cost-effectiveness of ICG fluorescence imaging in emergency general surgery**

**Statement 4.7**

ICG fluorescence imaging has minimal limitations in the assessment of bowel perfusion and anatomical structures during surgical dissection except for the subjective qualitative evaluation of images which quality depends on skills of the surgical staff in performing ICG fluorescence angiography and cholangiography. (QoE C-D) *(totally disagree 0%; neutral 16.1%-5/31participants;* ***agree 38.7%-12/31participants; totally agree 45.2%-14/31participants****).*

**Recommendation 4e**

The WSES panel of Experts recommends to implement the use of ICG in abdominal emergency general surgery as it can help assessing bowel viability and visualising anatomical structures during difficult dissection with minimal cost and significant effectiveness, when skills and equipment are available. (Strong recommendations based on low and very low level of evidence 2C) *(totally disagree 0%; neutral 6.5%-2/31participants;* ***agree 38.7%-12/31participants; totally agree 54.8%-17/31participants).***

**Absolute and relative contraindications of ICG implementation in general and trauma surgery**

**Statement 4.8**

Indocyanine green fluorescence dye is water soluble, FDA approved, and safe for human use. The only known absolute contraindication is in patients with a documented allergy to iodides or iodinated imaging agents as it contains sodium iodide, which can lead to anaphylaxis. A relative contraindication is that radioactive iodine uptake studies should not be performed for at least a week after the use of ICG. ( QoE B-C) *(totally disagree 0%; neutral 12.9%-4/31participants;* ***agree 29%-9/31participants; totally agree 54.8%-17/31participants).***

**Recommendation 4f**

Indocyanine green fluorescence dye has a high safety profile and can be applied repeatedly due to its short half-life. The WSES panel of Experts recommends not to administrate ICG dye in patients with known allergy to iodides and iodinated imaging agents (Strong recommendation based on moderate and low level of evidence 1B-C) *(totally disagree 0%; neutral 6.5%-2/31participants;* ***agree 22.6%-7/31participants; totally agree 67.7%-21/31participants).***
